# Supplementary material
Source: Springer Nature journal article supplement (https://www.springermedizin.de/resource/supplementary/12877_2011_734_MOESM2_ESM.pdf/9440086)
Supplement: MOESM2 [file 9440086]

- Screening potential participants on eligibility criteria by interview with the team healthy professionals
- Informative session for the potential participants and their family about the study

- Obtaining informed consent
- Inclusion

**1 week before  
Baseline measurements**

- baseline demographic, clinical characteristics
- dynamic/static balance
- muscle strength

**Randomization**

**Vibration group**

Exercises on the vibration platform

**Exercise group**

Same exercises such as vibration group without vibration platform

**6 weeks**

- Static and dynamic body balance (Tinetti test, Timed up & go test)
- Muscle performance (five repetitions of the Sit-to-Stand test and Smatcoach analyses)
- Adverse events
- Clinical characteristics
- Number of falls

**6 months**

- Static/dynamic balance (Tinetti test, Timed up & go test)
- Muscle performance (five repetitions of the Sit-to-Stand test)
- Clinical characteristics
- Number of falls
